# Supplementary material for: Impact of Antimicrobial Lipopeptides from Bacillus sp. on Suppression of Fusarium Yellows of Tatsoi
Source: PubMed Central journal article supplement (PMC4567569; doi:10.1264/jsme2.me15062), 2015-06-27
Supplement: 30_281_s1.pdf [file 30_281_s1.pdf]

Table S1 Disease suppression by purified lipopeptide amendment against *Fusarium yellows* of tatsoi ( $10^6$  conidia mL<sup>-1</sup> pathogen inoculation)

(A) Iturin A treatments

| Treatments                       | dpi       |              |              |              |              |              |              |              |              |
|----------------------------------|-----------|--------------|--------------|--------------|--------------|--------------|--------------|--------------|--------------|
|                                  | 7         | 8            | 9            | 10           | 11           | 12           | 13           | 14           | 15           |
| Healthy control                  | 0.0 ± 0.0 | 0.0 ± 0.0 ** | 0.0 ± 0.0 ** | 0.0 ± 0.0 ** | 0.0 ± 0.0 ** | 0.0 ± 0.0 ** | 0.0 ± 0.0 ** | 0.0 ± 0.0 ** | 0.0 ± 0.0 ** |
| Disease control                  | 0.0 ± 0.0 | 0.5 ± 1.0    | 1.0 ± 0.1    | 1.6 ± 0.2    | 2.4 ± 0.2    | 2.6 ± 0.1    | 2.7 ± 0.1    | 2.7 ± 0.1    | 2.8 ± 0.1    |
| 0.12 mg L <sup>-1</sup> iturin A | 0.0 ± 0.0 | 0.1 ± 0.1 ** | 0.4 ± 0.1 *  | 0.8 ± 0.2 ** | 1.5 ± 0.2 ** | 2.2 ± 0.2 *  | 2.4 ± 0.2    | 2.7 ± 0.1    | 2.8 ± 0.1    |
| 0.23 mg L <sup>-1</sup> iturin A | 0.0 ± 0.0 | 0.3 ± 0.1    | 1.0 ± 0.2    | 1.2 ± 0.2    | 1.9 ± 0.2 *  | 2.2 ± 0.2    | 2.5 ± 0.2    | 2.7 ± 0.2    | 2.7 ± 0.2    |
| 0.47 mg L <sup>-1</sup> iturin A | 0.0 ± 0.0 | 0.1 ± 0.1 ** | 0.3 ± 0.1 ** | 0.6 ± 0.1 ** | 1.0 ± 0.2 ** | 1.7 ± 0.2 ** | 2.0 ± 0.2 *  | 2.3 ± 0.2    | 2.5 ± 0.2    |
| 0.94 mg L <sup>-1</sup> iturin A | 0.0 ± 0.0 | 0.2 ± 0.04   | 0.7 ± 0.1    | 1.1 ± 0.2    | 1.7 ± 0.2 ** | 2.2 ± 0.2    | 2.4 ± 0.2    | 2.7 ± 0.2    | 2.8 ± 0.1    |
| 1.88 mg L <sup>-1</sup> iturin A | 0.0 ± 0.0 | 0.1 ± 0.1 ** | 0.7 ± 0.1    | 0.9 ± 0.2 ** | 1.5 ± 0.2 ** | 2.1 ± 0.2 *  | 2.4 ± 0.2    | 2.6 ± 0.2    | 2.7 ± 0.1    |
| 3.75 mg L <sup>-1</sup> iturin A | 0.0 ± 0.0 | 0.3 ± 0.1    | 0.8 ± 0.2    | 1.1 ± 0.2 *  | 1.9 ± 0.2    | 2.1 ± 0.2    | 2.4 ± 0.2    | 2.5 ± 0.2    | 2.6 ± 0.2    |

Mean ± SE of disease severity are represented. \*, significantly different at  $P < 0.05$  with Disease control by Wilcoxon U-test; \*\*, significantly different at  $P < 0.01$  with Disease control by Wilcoxon U-test

(B) Surfactin treatments

| Treatments                        | dpi       |              |              |              |              |              |              |              |              |
|-----------------------------------|-----------|--------------|--------------|--------------|--------------|--------------|--------------|--------------|--------------|
|                                   | 7         | 8            | 9            | 10           | 11           | 12           | 13           | 14           | 15           |
| Healthy control                   | 0.0 ± 0.0 | 0.0 ± 0.0 ** | 0.0 ± 0.0 ** | 0.0 ± 0.0 ** | 0.0 ± 0.0 ** | 0.0 ± 0.0 ** | 0.0 ± 0.0 ** | 0.0 ± 0.0 ** | 0.0 ± 0.0 ** |
| Disease control                   | 0.0 ± 0.0 | 0.2 ± 0.08   | 0.7 ± 0.1    | 1.2 ± 0.1    | 1.8 ± 0.2    | 2.1 ± 0.2    | 2.5 ± 0.2    | 2.7 ± 0.1    | 2.8 ± 0.1    |
| 0.12 mg L <sup>-1</sup> surfactin | 0.0 ± 0.0 | 0.2 ± 0.08   | 0.7 ± 0.1    | 1.1 ± 0.1    | 1.8 ± 0.2    | 2.6 ± 0.1    | 2.9 ± 0.1 *  | 3.0 ± 0.03   | 3.0 ± 0.0    |
| 0.23 mg L <sup>-1</sup> surfactin | 0.0 ± 0.0 | 0.2 ± 0.08   | 0.4 ± 0.1    | 1.0 ± 0.2    | 1.4 ± 0.2    | 1.9 ± 0.2    | 2.4 ± 0.2    | 2.6 ± 0.2    | 2.7 ± 0.2    |
| 0.47 mg L <sup>-1</sup> surfactin | 0.0 ± 0.0 | 0.1 ± 0.06   | 0.4 ± 0.1    | 1.0 ± 0.2    | 1.6 ± 0.2    | 2.4 ± 0.2    | 2.8 ± 0.1    | 2.9 ± 0.1    | 2.9 ± 0.1    |
| 0.94 mg L <sup>-1</sup> surfactin | 0.0 ± 0.0 | 0.0 ± 0.0 ** | 0.4 ± 0.1    | 1.0 ± 0.2    | 1.8 ± 0.3    | 2.7 ± 0.1    | 2.8 ± 0.1 *  | 2.9 ± 0.1    | 2.9 ± 0.1    |
| 1.88 mg L <sup>-1</sup> surfactin | 0.0 ± 0.0 | 0.3 ± 0.08   | 0.8 ± 0.1    | 1.7 ± 0.1 ** | 2.3 ± 0.2    | 2.8 ± 0.1 *  | 3.0 ± 0.0 ** | 3.0 ± 0.0 *  | 3.0 ± 0.0    |
| 3.75 mg L <sup>-1</sup> surfactin | 0.0 ± 0.0 | 0.1 ± 0.06   | 0.6 ± 0.1    | 1.5 ± 0.2    | 2.1 ± 0.2    | 2.5 ± 0.2    | 2.8 ± 0.1    | 2.9 ± 0.1    | 2.9 ± 0.1    |

Mean ± SE of disease severity are represented. \*, significantly different at  $P < 0.05$  with Disease control by Wilcoxon U-test; \*\*, significantly different at  $P < 0.01$  with Disease control by Wilcoxon U-test

**Fig. S1.** HPLC chromatogram of purified iturin A. Peaks 1 to 7 correspond to iturin A2 to A8, respectively.

**Fig. S2.** Antifungal activities of iturin A and surfactin for the pathogen of Fusarium yellows of tatsoi in a liquid culture.

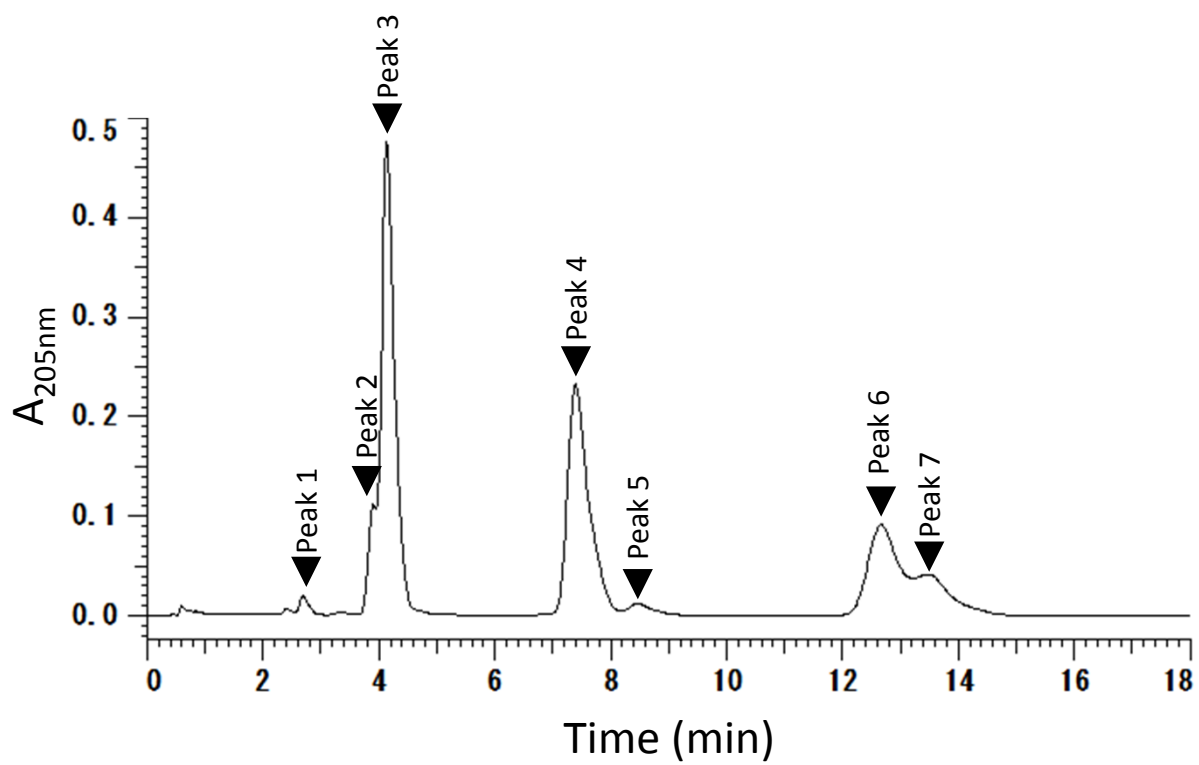

Fig. S1. Yokota

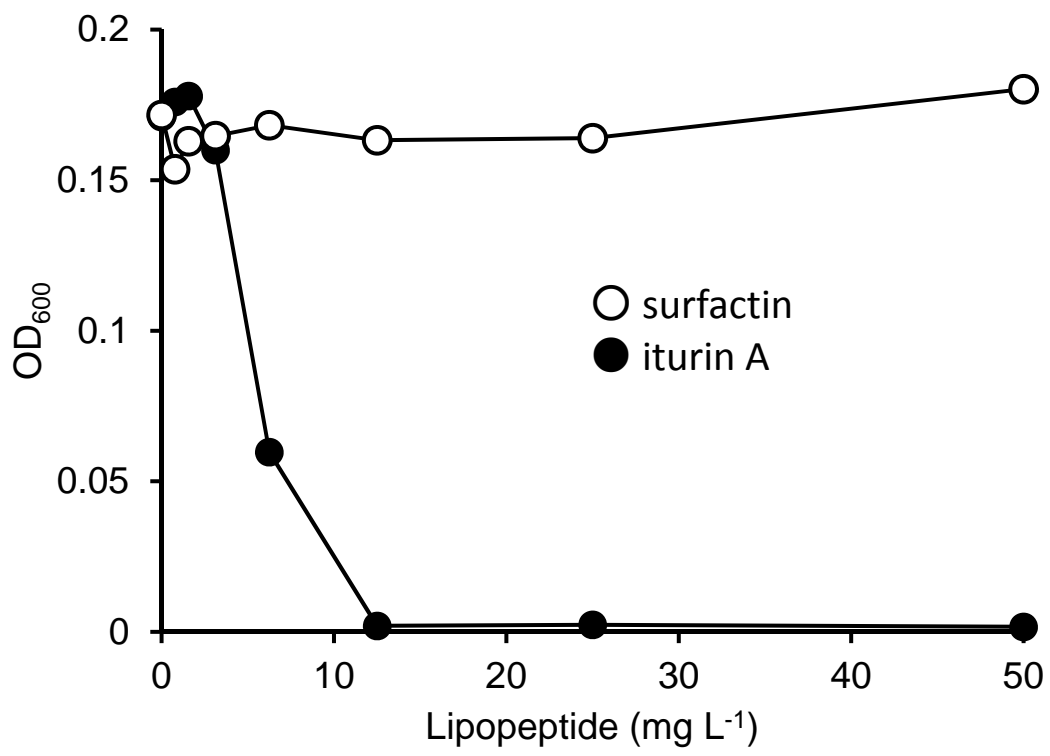

Fig. S2. Yokota
